# Supplementary material for: Highly isotactic polylactide by binary organocatalyzed polymerization of 1,3-dioxolan-4-ones
Source: Royal Society of Chemistry journal article supplement (doi:10.1039/d5py00205b), 2025-01-01
Supplement: d5py00205b1.pdf [file d5py00205b1.pdf]

# Highly Isotactic Polylactide by Binary Organocatalyzed Polymerization of 1,3-Dioxolan- 4-Ones

*Mengyu Wang, Sumin Lee, Hyunhee Lee, and Byeong-Su Kim\**

Department of Chemistry, Yonsei University, Seoul 03722, Republic of Korea

E-mail: bskim19@yonsei.ac.kr (B.-S.K.)

## Methods and Reagents

1,3-Dicyclohexylthiourea (TCI, >98.0%) and 1,3-bis[3,5-bis(trifluoromethyl)phenyl]thiourea (TCI, >98.0%) were purchased from commercial vendors. *N'*-[3,5-Bis(trifluoromethyl)phenyl]-*N*-cyclohexylthiourea was prepared as previously reported.<sup>1</sup> Benzyl alcohol (Aldrich, 99.8%) was distilled over calcium hydride (CaH<sub>2</sub>). All solvents for polymerization were distilled over CaH<sub>2</sub> and stored over 3 Å molecular sieves (20% m/v) in a glovebox. Other materials used in this study were purchased from commercial chemical suppliers (Sigma-Aldrich, TCI Chemicals, Thermo Fisher Scientific, Acros Organics, and SAMCHUN Chemicals unless otherwise stated. Deuterated CDCl<sub>3</sub> was purchased from Cambridge Isotope Laboratory.

## Characterizations

$^1\text{H}$  NMR and homonuclear decoupled  $^1\text{H}$  NMR spectra were recorded on a Bruker 400 MHz spectrometer at 25 °C.  $\text{CDCl}_3$  ( $\delta\text{H} = 7.26$  ppm) was used as the internal standard. The samples were obtained with the decoupling pulse based on the methyl region ( $\delta = 1.5$  ppm). When the methine region ( $\delta = 5.15\text{--}5.22$  ppm) was well-resolved, global spectral deconvolution was implemented to assign five *meso* dyads.  $P_m$  values were calculated as the *mmm* peak area relative to the total area. The number-averaged ( $M_n$ ) and weight-averaged ( $M_w$ ) molecular weights and the corresponding molecular weight distribution ( $M_w/M_n$ ,  $D$ ) were measured by gel permeation chromatography (GPC, Agilent 1200 series) using THF as an eluent at 25 °C at a flow rate of  $1.00\text{ mL min}^{-1}$  with a refractive index (RI) detector. All calibrations were performed using polystyrene (PS) standards (Sigma-Aldrich,  $M_p$  250–1,100,000). MALDI-ToF mass spectrometry measurements were performed using *trans*-2-[3-(4-*tert*-butylphenyl)-2-methyl-2-propenylidene] malononitrile as a matrix on a Bruker Autoflex Max instrument. Differential scanning calorimetry (DSC) (Q200 model, TA Instruments, Tzero Aluminum Pan) was performed under nitrogen from 0 to 220 °C with a heating rate of  $10\text{ °C min}^{-1}$ .

## (*S*)-Me<sub>3</sub>DOX monomer synthesis

The parent  $\alpha$ -hydroxy acid (7.53 mmol), and *p*-toluenesulfonic acid (0.75 mmol) were dissolved in a mixture of acetone and petroleum ether (1:1 v/v, 50 mL) and refluxed in a Dean–Stark apparatus, periodically removing water formed over 12 h. After cooling, the solvent was evaporated. The residue was dissolved in 50 mL of ethyl acetate and washed three times with 25 mL of aqueous sodium bicarbonate solution and brine. The organic layer was dried over sodium sulfate and the solvent evaporated in vacuo. The crude product was then stirred over  $\text{CaH}_2$  for 16 h before vacuum distillation to obtain pure (*S*)-Me<sub>3</sub>DOX (colorless oil, 41% yield). 2,2,5-trimethyl-1,3-dioxolan-4-one ((*S*)-Me<sub>3</sub>DOX).  $^1\text{H}$  NMR (400 MHz,  $\text{CDCl}_3$ )  $\delta$  (ppm) 4.47

(q 1H), 1.56 (s 3H), 1.49 (s 3H), 1.42 (d 3H).  $^{13}\text{C}$  NMR (101 MHz,  $\text{CDCl}_3$ )  $\delta$  (ppm) 173.38, 110.36, 70.43, 27.41, 25.58, 17.37.

#### **Typical procedure for polymerization of (*S*)-Me<sub>3</sub>DOX**

TU-B (0.06 mmol), DBU (0.02 mmol), BnOH (0.02 mmol), and (*S*)-Me<sub>3</sub>DOX (1.0 mmol) were added to an oven-dried ampoule with a stirring bar in an argon-filled glovebox. The ampoule was then sealed for 4 h. The reaction was then quenched with two drops of MeOH, and samples were taken for crude  $^1\text{H}$  NMR analysis. The polymer was precipitated with cold MeOH to remove unreacted monomers and impurities. The precipitated polymer was dried under a vacuum at 60 °C.

**Table S1.** Ring-opening polymerization results of (*S/R*)-Me<sub>3</sub>DOX.

| Entry          | Monomer                          | [M]:[I]:[C] | Time (h) | Conv. <sup>a</sup> (%) | $M_{n,theo}^b$ (g mol <sup>-1</sup> ) | $M_{n,GPC}^c$ (g mol <sup>-1</sup> ) | <i>D</i> | <i>P<sub>m</sub></i> <sup>d</sup> |
|----------------|----------------------------------|-------------|----------|------------------------|---------------------------------------|--------------------------------------|----------|-----------------------------------|
| 1              | ( <i>S</i> )-Me <sub>3</sub> DOX | 50:1:1:1    | 6        | 73                     | 2740                                  | 4000                                 | 1.44     | n.d.                              |
| 2              | ( <i>S</i> )-Me <sub>3</sub> DOX | 50:1:1:1    | 12       | 75                     | 2810                                  | 4300                                 | 1.55     | n.d.                              |
| 3              | ( <i>S</i> )-Me <sub>3</sub> DOX | 50:1:1:1.5  | 4        | 74                     | 2770                                  | 5000                                 | 1.41     | 0.77                              |
| 4              | ( <i>S</i> )-Me <sub>3</sub> DOX | 50:1:1:1.5  | 6        | 77                     | 2880                                  | 4000                                 | 1.44     | n.d.                              |
| 5              | ( <i>S</i> )-Me <sub>3</sub> DOX | 50:1:1:3    | 2        | 71                     | 2660                                  | 5400                                 | 1.45     | 0.92                              |
| 6 <sup>e</sup> | ( <i>S</i> )-Me <sub>3</sub> DOX | 50:1:1:3    | 2        | 79                     | 2950                                  | 4660                                 | 1.52     | n.d.                              |
| 7              | ( <i>R</i> )-Me <sub>3</sub> DOX | 50:1:1:3    | 2        | 72                     | 2700                                  | 5120                                 | 1.45     | 0.88                              |
| 8              | ( <i>R</i> )-Me <sub>3</sub> DOX | 100:1:1:3   | 4        | 72                     | 5290                                  | 7060                                 | 1.52     | 0.90                              |
| 9              | ( <i>R</i> )-Me <sub>3</sub> DOX | 150:1:1:3   | 5        | 69                     | 7560                                  | 7080                                 | 1.49     | 0.87                              |

Conditions: Benzyl alcohol as an initiator, DBU/TU-B as catalysts, at 25 °C under bulk condition. <sup>a</sup>Monomer conversion determined by <sup>1</sup>H NMR in CDCl<sub>3</sub> using integrals of the characteristic signals. <sup>b</sup>Calculated using  $M_{Me_3DOX}$  (72.08 g mol<sup>-1</sup>) × ([M]<sub>0</sub> / [I]<sub>0</sub>) × conversion +  $M_{BnOH}$  (108.14 g mol<sup>-1</sup>). <sup>c</sup>Obtained from GPC analysis (THF, PS standards). <sup>d</sup>Possibility of formation of the *meso* diad from the homonuclear decoupled <sup>1</sup>H NMR spectrum calculated based on the CEC mechanism. <sup>e</sup>Condition: at 40 °C.

**Table S2.** Comparison of catalytic performance in ROP of DOXs.

| Entry | Monomer                                             | Catalyst                                                                       | Conditions                      | Polymer                             | Ref.      |
|-------|-----------------------------------------------------|--------------------------------------------------------------------------------|---------------------------------|-------------------------------------|-----------|
| 1     | 5-methyl-1,3-dioxolan-4-one (MeDOX) and derivatives | Salen complexes,<br>$k_{\text{obs}}=3.0 \times 10^{-5} \text{ s}^{-1}$         | 120 °C, 24 h,<br>solution       | poly(lactic acid)                   | 15        |
| 2     | 5-phenyl-1,3-dioxolane-4-one (PhDOX)                | Salen complexes                                                                | 120 °C, 18 h,<br>dynamic vacuum | poly(mandelic acid)                 | 16        |
| 3     | Me <sub>3</sub> DOX                                 | <i>p</i> -toluenesulfonic acid                                                 | 120 °C, 6 h,<br>bulk            | poly(lactic acid)                   | 17        |
| 4     | Me <sub>3</sub> DOX                                 | Salen complexes                                                                | 100 °C, 6 h,<br>solution        | poly( <i>rac</i> -lactic acid)      | 18        |
| 5     | Me <sub>3</sub> DOX                                 | Binary organocatalyst<br>$k_{\text{p,app}}=9.03 \times 10^{-5} \text{ s}^{-1}$ | ambient, 4 h<br>bulk            | poly(lactic acid),<br>stereocomplex | This work |

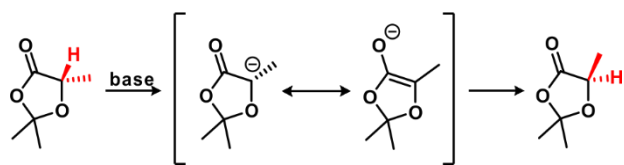

**Figure S1.** Epimerization of  $\alpha$ -proton in  $(S)$ -Me<sub>3</sub>DOX ROP.

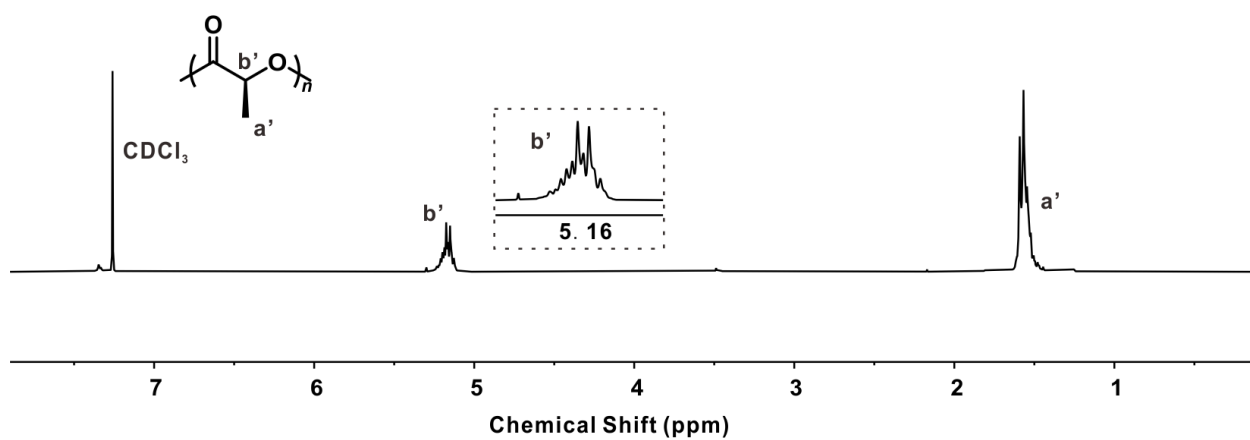

**Figure S2.**  $^1\text{H}$  NMR spectrum of pure P(S-LA) (entry 3 in Table 1) (400 MHz,  $\text{CDCl}_3$ ).

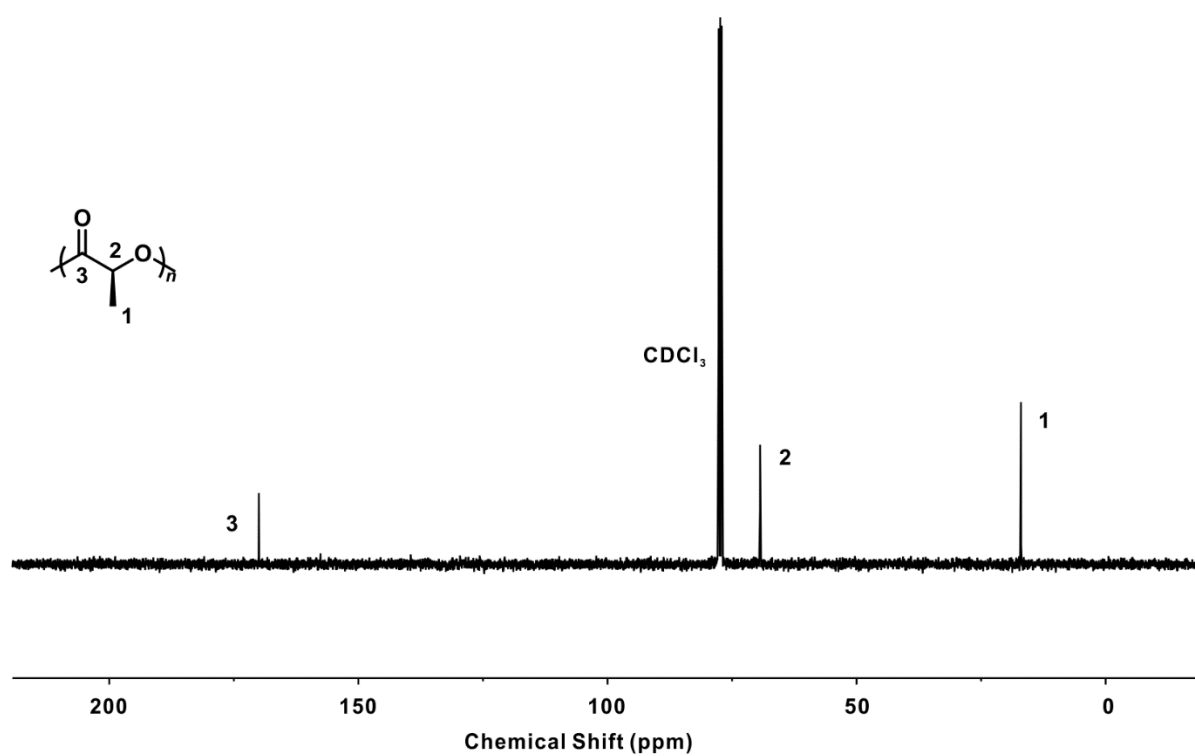

**Figure S3.**  $^{13}\text{C}$  NMR spectrum of pure P(S-LA) (entry 6 in Table 1) (101 MHz,  $\text{CDCl}_3$ ).



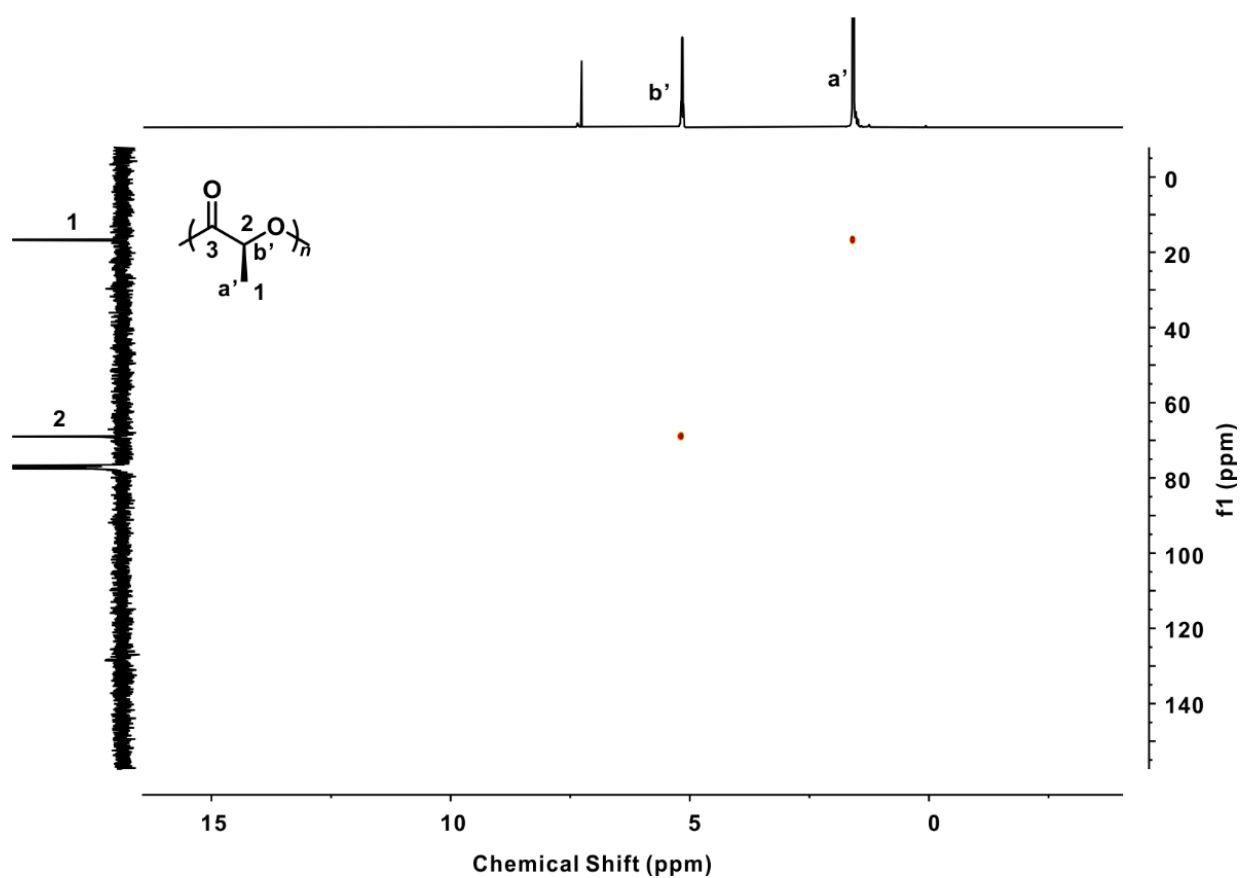

**Figure S4.** HSQC NMR spectrum of pure P(S-LA) (entry 6 in Table 1) ( $\text{CDCl}_3$ ).

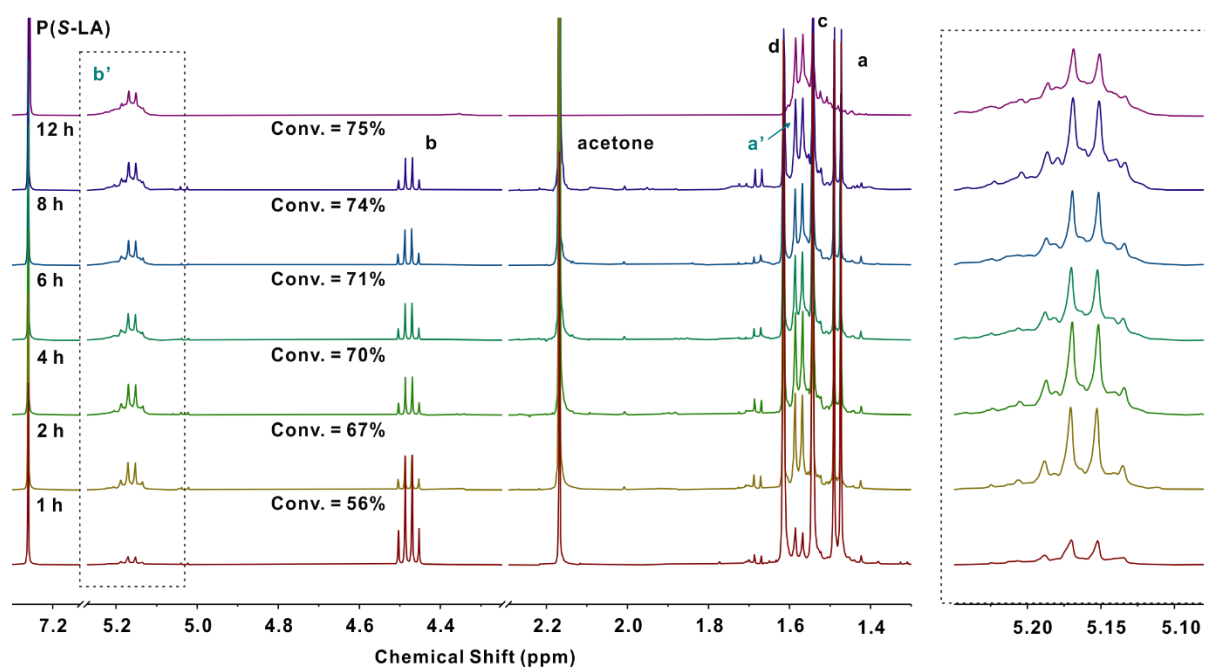

**Figure S5.** Stacked  $^1\text{H}$  NMR spectra of samples taken from the  $(S)\text{-Me}_3\text{DOX}$  polymerization reaction (Table S1, entry 2) (400 MHz,  $\text{CDCl}_3$ ).

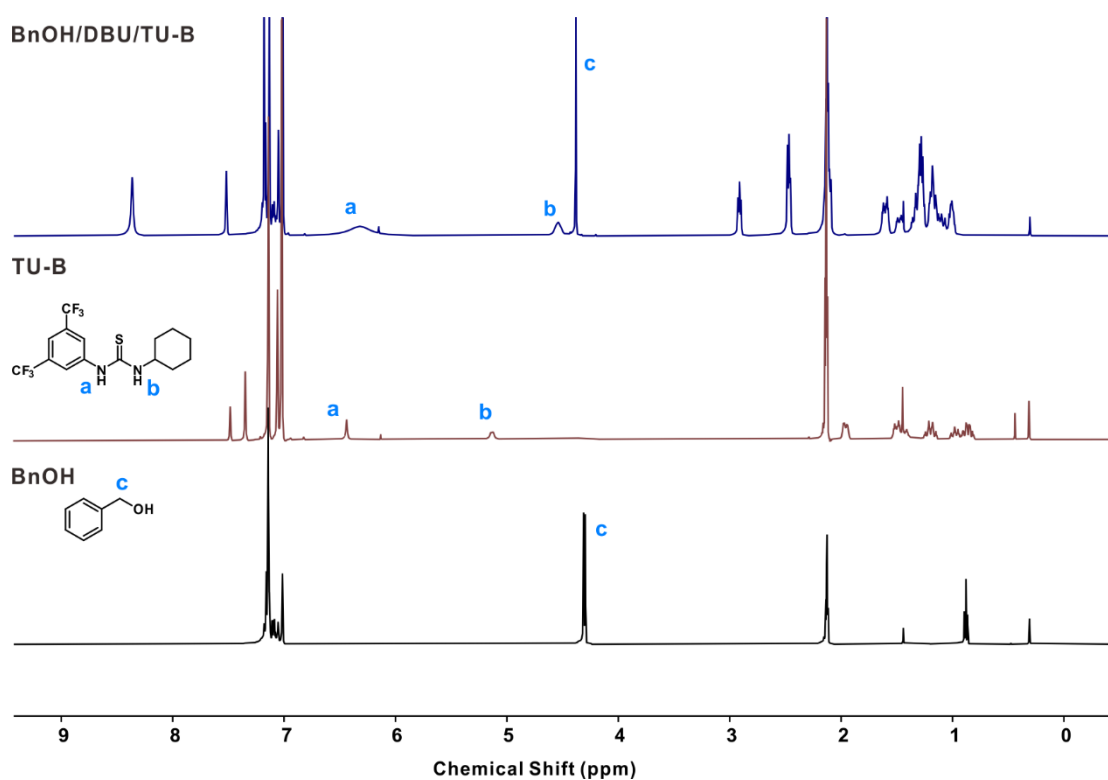

**Figure S6.**  $^1\text{H}$  NMR spectra of BnOH/DBU/TU-B (1:1:3), TU-B and BnOH (400 MHz, toluene- $d_8$ ).

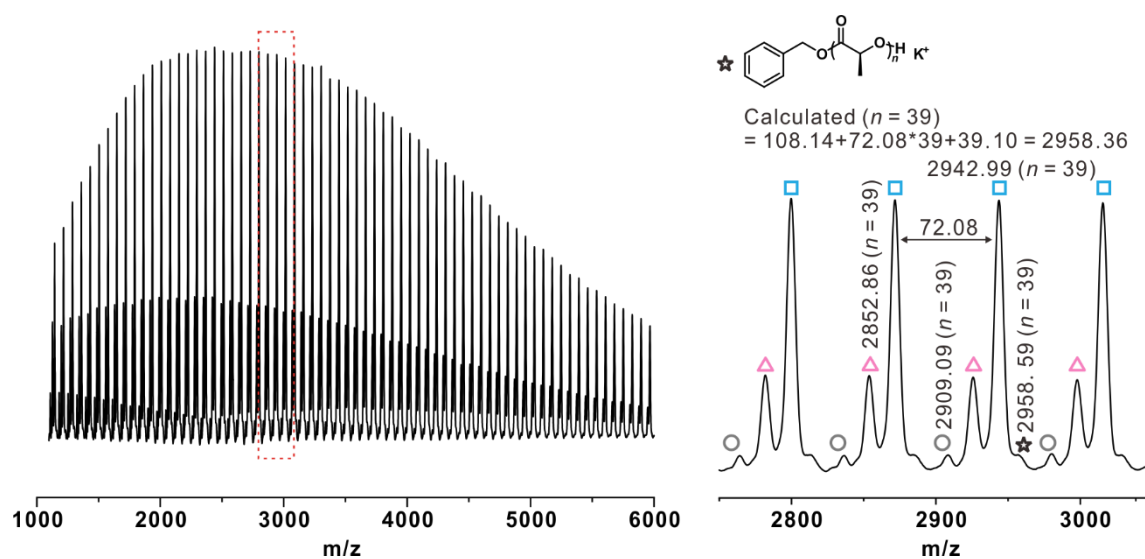

**Figure S7.** Representative MALDI-ToF full spectrum of P(*S*-LA) (entry 7 in Table 1). (Experimental condition: linear positive mode, sodium trifluoroacetate (NaTFA) as anionization agent, 2,5-Dihydroxybenzoic acid (DHB) as a matrix, laser intensity 75%).

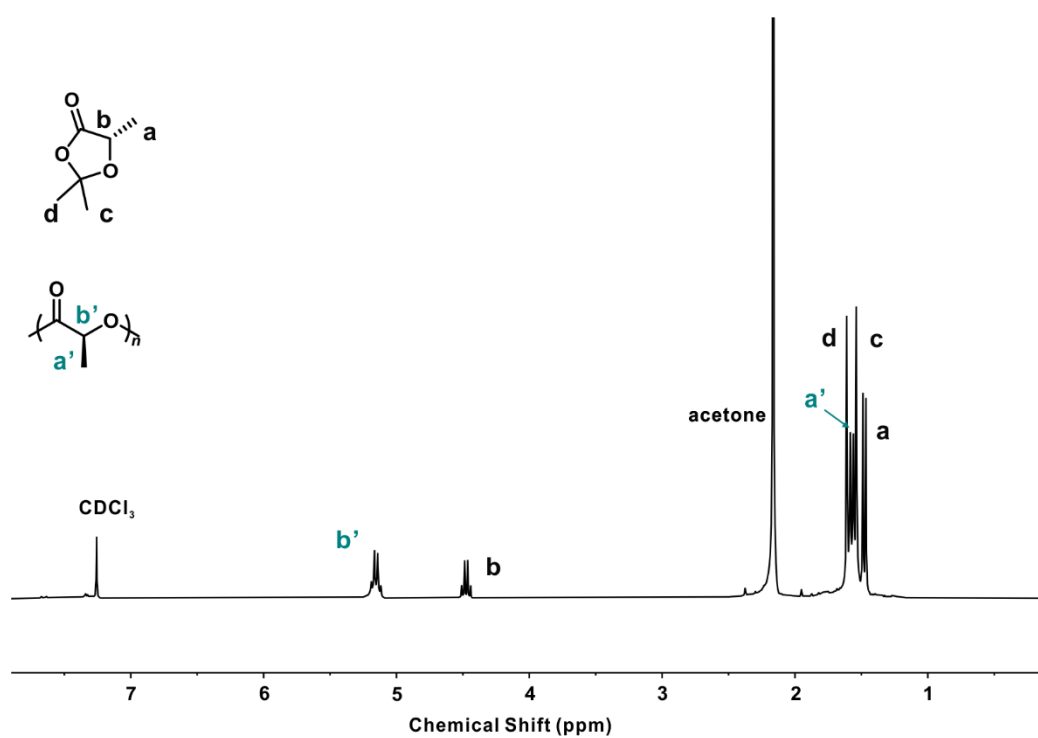

**Figure S8.**  $^1\text{H}$  NMR spectrum of crude P(S-LA) (entry 7 in Table 1) (400 MHz,  $\text{CDCl}_3$ ).

### Calculation of $P_m$ value

The homonuclear decoupled  $^1\text{H}$  NMR spectra were measured to determine the stereoregularity of obtained PLAs, and the  $P_m$  values were calculated according to the chain-end control (CEC) mechanisms.<sup>2, 3</sup> In the methine region corresponding to five tetrad *meso* dyads, we applied Bernoullian statistics based on the CEC (Table S3).

**Table S3.** Tetrad probabilities of CEC based on Bernoullian statistics.

| Tetrad         | Probability of CEC (Bernoullian) |
|----------------|----------------------------------|
| <i>rmr</i>     | $0.5P_r^2$                       |
| <i>rmm/mmr</i> | $0.5P_mP_r$                      |
| <i>mmr/rmm</i> | $0.5P_mP_r$                      |
| <i>mmm</i>     | $P_m^2 + 0.5P_mP_r$              |
| <i>rrm</i>     | $0.5(P_m^2 + P_mP_r)$            |

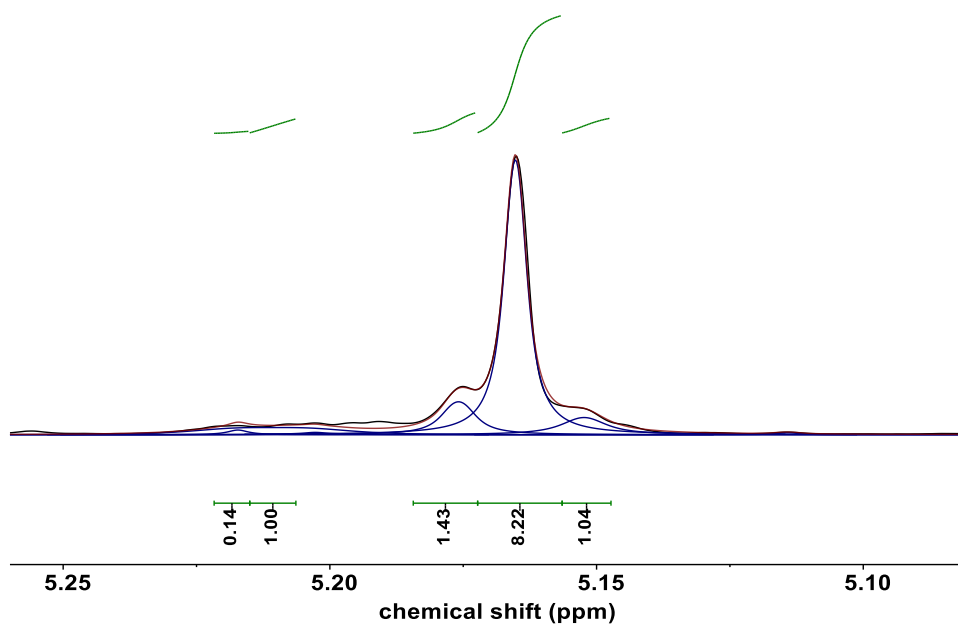

| ppm     | Tetrad         | Ratio | $P_{m,CEC}$ |
|---------|----------------|-------|-------------|
| 5.22    | <i>rmr</i>     | 0.012 | 0.85        |
| 5.21    | <i>mmm/mmr</i> | 0.085 | 0.78        |
| 5.18    | <i>mmr/rmm</i> | 0.121 | 0.59        |
| 5.17    | <i>mmm</i>     | 0.695 | 0.78        |
| 5.15    | <i>mrn</i>     | 0.088 | 0.82        |
| Average |                |       | 0.77        |

**Figure S9.** Homonuclear decoupled  $^1\text{H}$  NMR spectrum of the methine region of P(*S*-LA) from (*S*)-Me<sub>3</sub>DOX (entry 5 in Table 1) (400 MHz, CDCl<sub>3</sub>).

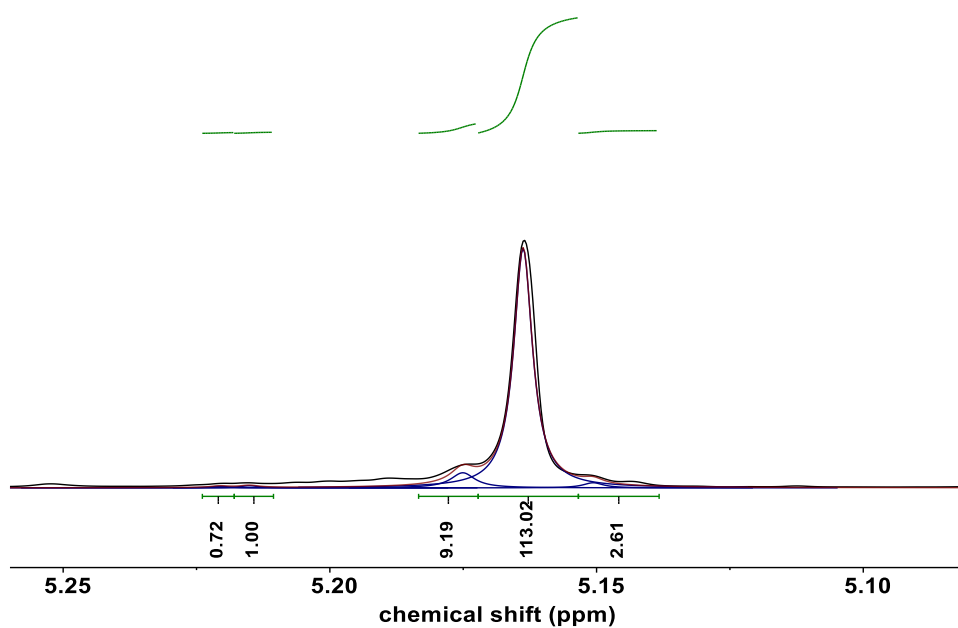

| ppm     | Tetrad         | Ratio | $P_{m,CEC}$ |
|---------|----------------|-------|-------------|
| 5.22    | <i>rmr</i>     | 0.006 | 0.89        |
| 5.22    | <i>rmm/mmr</i> | 0.008 | 0.98        |
| 5.18    | <i>mmr/rmm</i> | 0.073 | 0.82        |
| 5.16    | <i>mmm</i>     | 0.893 | 0.93        |
| 5.15    | <i>mrn</i>     | 0.021 | 0.96        |
| Average |                |       | 0.92        |

**Figure S10.** Homonuclear decoupled  $^1\text{H}$  NMR spectrum of the methine region of P(*S*-LA) from (*S*)-Me<sub>3</sub>DOX (entry 6 in Table 1) (400 MHz, CDCl<sub>3</sub>).



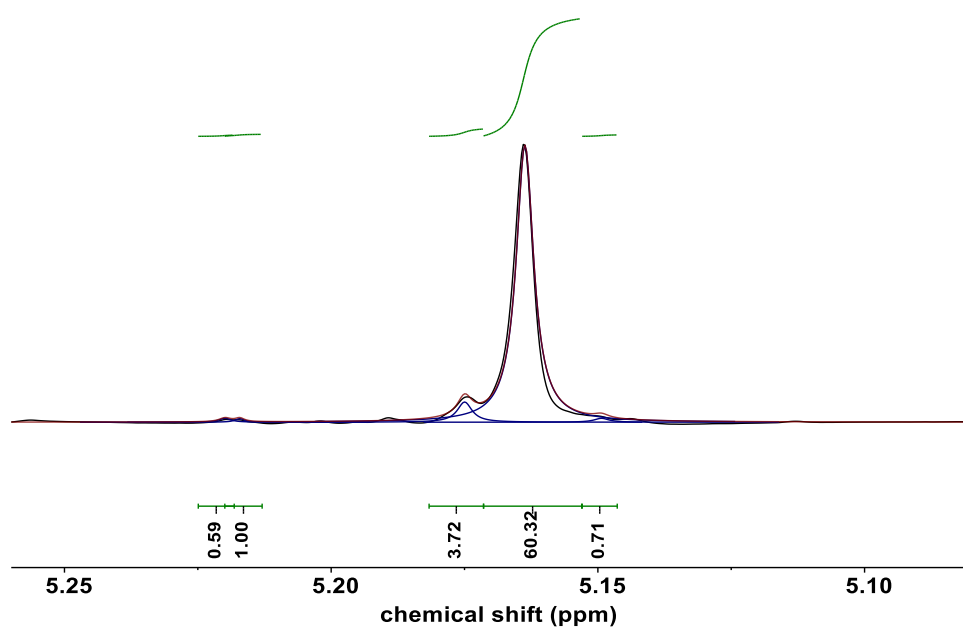

| ppm     | Tetrad         | Ratio | $P_{m,CEC}$ |
|---------|----------------|-------|-------------|
| 5.23    | <i>rmr</i>     | 0.009 | 0.87        |
| 5.22    | <i>rmr/mmr</i> | 0.015 | 0.97        |
| 5.18    | <i>mmr/rmm</i> | 0.050 | 0.89        |
| 5.16    | <i>mmm</i>     | 0.915 | 0.94        |
| 5.15    | <i>mrn</i>     | 0.011 | 0.98        |
| Average |                |       | 0.93        |

**Figure S11.** Homonuclear decoupled  $^1\text{H}$  NMR spectrum of the methine region of P(*S*-LA) from (*S*)-Me<sub>3</sub>DOX (entry 7 in Table 1) (400 MHz, CDCl<sub>3</sub>).

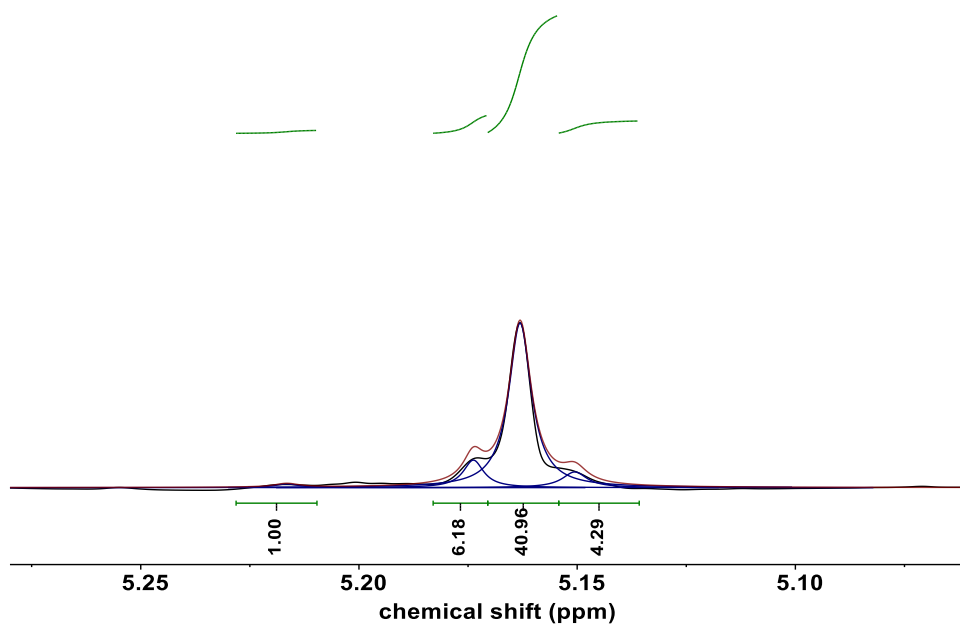

| ppm     | Tetrad         | Ratio | $P_{m,CEC}$ |
|---------|----------------|-------|-------------|
| -       | <i>rmr</i>     | 0.000 | 1.00        |
| 5.22    | <i>rmm/mmr</i> | 0.019 | 0.96        |
| 5.17    | <i>mmr/rmm</i> | 0.118 | 0.62        |
| 5.16    | <i>mmm</i>     | 0.781 | 0.85        |
| 5.15    | <i>mrmm</i>    | 0.082 | 0.84        |
| Average |                |       | 0.85        |

**Figure S12.** Homonuclear decoupled  $^1\text{H}$  NMR spectrum of the methine region of P(*S*-LA) from (*S*)-Me<sub>3</sub>DOX (entry 8 in Table 1) (400 MHz, CDCl<sub>3</sub>).

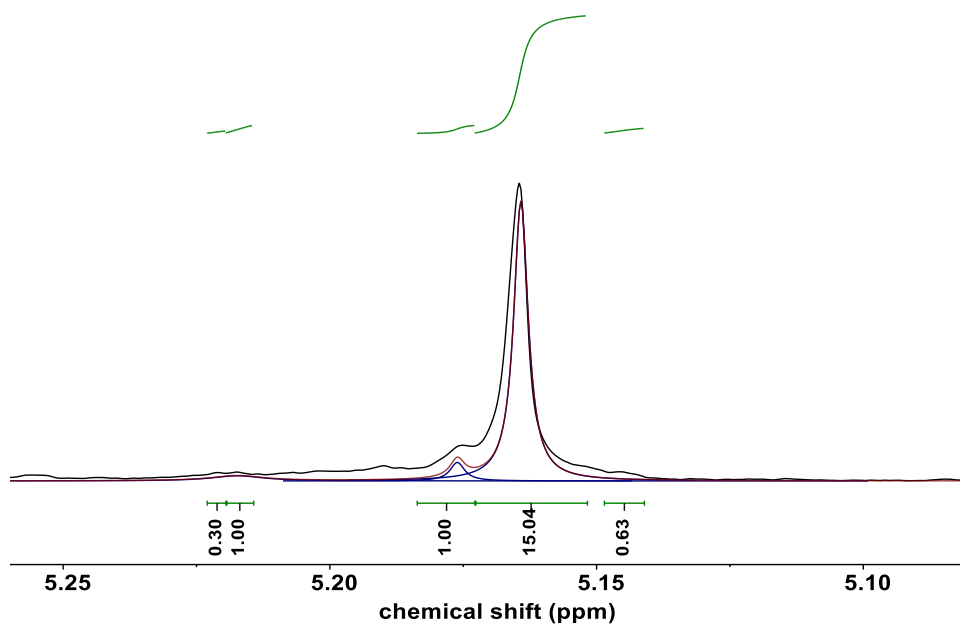

| ppm     | Tetrad         | Ratio | $P_{m,CEC}$ |
|---------|----------------|-------|-------------|
| 5.22    | <i>rmr</i>     | 0.017 | 0.82        |
| 5.22    | <i>rmm/mmr</i> | 0.056 | 0.87        |
| 5.18    | <i>mmr/rmm</i> | 0.056 | 0.87        |
| 5.16    | <i>mmm</i>     | 0.837 | 0.89        |
| 5.15    | <i>mrn</i>     | 0.035 | 0.93        |
| Average |                |       | 0.88        |

**Figure S13.** Homonuclear decoupled  $^1\text{H}$  NMR spectrum of the methine region of P(*R*-LA) from (*R*)-Me<sub>3</sub>DOX (entry 1 in Table S1) (400 MHz, CDCl<sub>3</sub>).

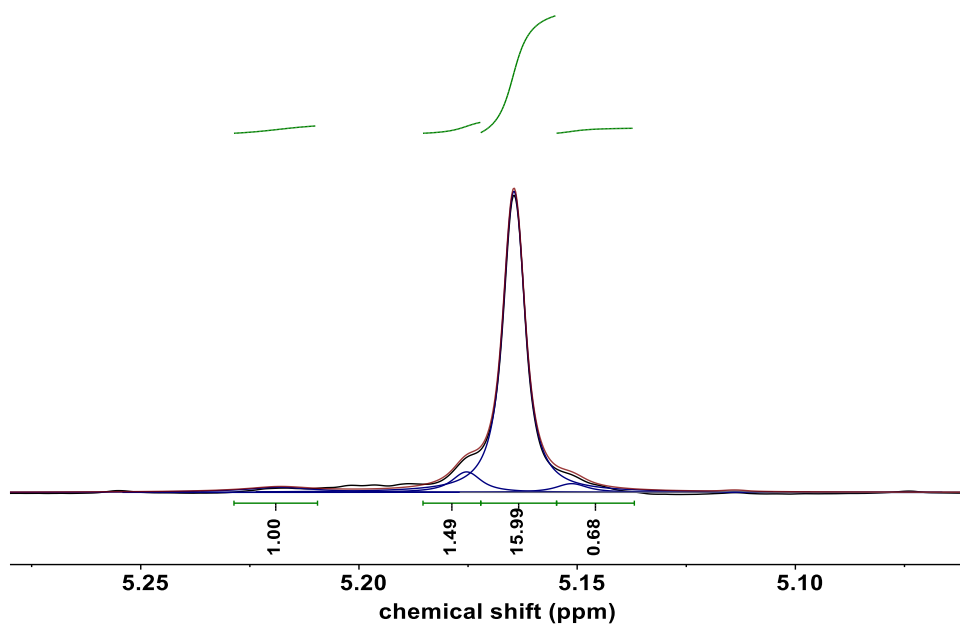

| ppm     | Tetrad         | Ratio | $P_{m,CEC}$ |
|---------|----------------|-------|-------------|
| -       | <i>rmr</i>     | 0.000 | 1.00        |
| 5.22    | <i>rmm/mmr</i> | 0.052 | 0.88        |
| 5.18    | <i>mmr/rmm</i> | 0.078 | 0.81        |
| 5.16    | <i>mmm</i>     | 0.835 | 0.89        |
| 5.15    | <i>mrn</i>     | 0.035 | 0.93        |
| Average |                | 0.90  |             |

**Figure S14.** Homonuclear decoupled  $^1\text{H}$  NMR spectrum of the methine region of P(*R*-LA) from (*R*)-Me<sub>3</sub>DOX (entry 2 in Table S1) (400 MHz, CDCl<sub>3</sub>).

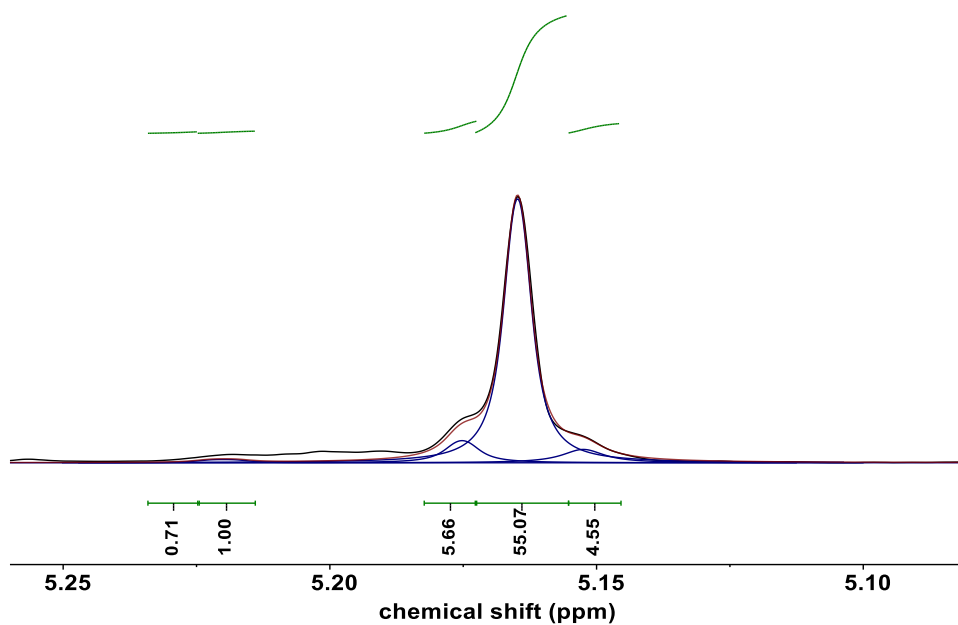

| ppm     | Tetrad         | Ratio | $P_{m,CEC}$ |
|---------|----------------|-------|-------------|
| 5.23    | <i>rmr</i>     | 0.011 | 0.85        |
| 5.22    | <i>rmr/mmr</i> | 0.015 | 0.97        |
| 5.18    | <i>mmr/rmm</i> | 0.084 | 0.78        |
| 5.16    | <i>mmm</i>     | 0.822 | 0.88        |
| 5.15    | <i>mrn</i>     | 0.068 | 0.86        |
| Average |                |       | 0.87        |

**Figure S15.** Homonuclear decoupled  $^1\text{H}$  NMR spectrum of the methine region of P(*R*-LA) from (*R*)-Me<sub>3</sub>DOX (entry 3 in Table S1) (400 MHz, CDCl<sub>3</sub>).

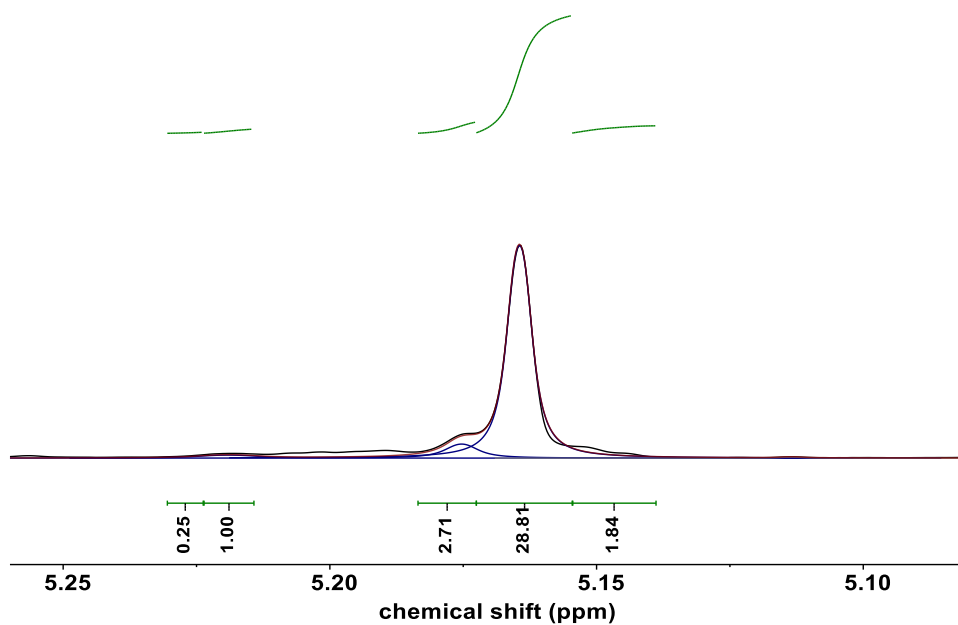

| ppm     | Tetrad         | Ratio | $P_{m,CEC}$ |
|---------|----------------|-------|-------------|
| 5.23    | <i>rmr</i>     | 0.007 | 0.88        |
| 5.22    | <i>rmr/mmr</i> | 0.029 | 0.94        |
| 5.18    | <i>mmr/rmm</i> | 0.078 | 0.81        |
| 5.16    | <i>mmm</i>     | 0.832 | 0.88        |
| 5.15    | <i>mrm</i>     | 0.053 | 0.89        |
| Average |                |       | 0.88        |

**Figure S16.** Homonuclear decoupled  $^1\text{H}$  NMR spectrum of the methine region of *sc*-PLA (400 MHz,  $\text{CDCl}_3$ ).

## References

- S1. O. Coulembier, D. P. Sanders, A. Nelson, A. N. Hollenbeck, H. W. Horn, J. E. Rice, M. Fujiwara, P. Dubois and J. L. Hedrick, *Angew. Chem. Int. Ed.*, 2009, **48**, 5170–5173.
- S2. B. Orhan, M. J.-L. Tschan, A.-L. Wirotius, A. P. Dove, O. Coulembier and D. Taton, *ACS Macro Lett.*, 2018, **7**, 1413–1419.
- S3. X. Jiang, N. Zhao and Z. Li, *Chin. J. Chem.*, 2021, **39**, 2403–2409.
